# Supplementary material
Source: HighWire-hosted journal article supplement (https://openheart.bmj.com/content/12/1/e003181)
Supplement: inline-supplementary-material-1 [file inline-supplementary-material-1.pdf]

## Impact of aortic landing zone geometry on TAVI implantation depth: comparison between Acurate neo2 and Portico/Evolut

Francesco Sturla<sup>1,2</sup> PhD, Filippo Pensotti<sup>3</sup> MD, Omar A. Oliva<sup>3</sup> MD, Mattia Squillace<sup>3</sup> MD, Enrico Poletti<sup>3</sup> MD, Maurizio Tusa<sup>3</sup> MD, Jessica Zannoni<sup>3</sup> MD, Emiliano Votta<sup>2</sup> PhD, Nedy Brambilla<sup>3</sup> MD, Luca Testa<sup>3</sup> MD, PhD, Francesco Bedogni<sup>3</sup> MD, Riccardo Gorla<sup>3</sup> MD, PhD

<sup>1</sup> 3D and Computer Simulation Laboratory, IRCCS Policlinico San Donato, San Donato Milanese, Italy

<sup>2</sup> Department of Electronics, Information and Bioengineering, Politecnico di Milano, Milano, Italy

<sup>3</sup> Department of Clinical and Interventional Cardiology, IRCCS Policlinico San Donato, San Donato Milanese, Italy

## SUPPLEMENTARY MATERIAL

### Theoretical implantation depth

The implantation depth was defined averaging the maximal distance (expressed in millimeters) between the intraventricular end of the bioprosthesis and the aortic annulus as the level of both the noncoronary cusp (NCC) and the left coronary cusp (LCC). A theoretical mean implantation depth of 4 mm below annular level, which is the target implantation depth of the ACURATE *neo* valve, was assumed for the comparative analysis of landing zones in terms of curvature and angulation.<sup>1</sup> The optimal implant position for the Portico corresponds to an implantation depth between 3 mm and 6 mm.<sup>2</sup> Also, instructions for use for the Evolut R/PRO specify an implant depth between 3 and 5 mm.<sup>3</sup> Hence, for the sake of comparison, a theoretical implantation depth of 4 mm was considered appropriate. According to Breitbart and co-workers,<sup>4</sup> a mean implantation depth of at least 4mm demonstrated to be effective in reducing the occurrence of new conduction disturbances post-TAVI. Furthermore, correct implantation was defined by Petronio *et al.*<sup>5</sup> as a depth  $\leq 6$  mm below the annulus plane.

<sup>1</sup> Toggweiler S, Nissen H, Mogensen B, Cuculi F, Fallesen C, Veien KT, Brinkert M, Kobza R, Rück A. *Very low pacemaker rate following ACURATE neo transcatheter heart valve implantation*. EuroIntervention 2017; 13(11):1273-1280. DOI: [10.4244/EIJ-D-17-00252](https://doi.org/10.4244/EIJ-D-17-00252)

<sup>2</sup> Manoharan G, Spence MS, Rodés-Cabau J, Webb JG. *St Jude Medical Portico valve*. EuroIntervention 2012; 8 Suppl Q:Q97-101. DOI: [10.4244/EIJV8SQA18](https://doi.org/10.4244/EIJV8SQA18)

<sup>3</sup> Jilaihawi H, Zhao ZG, Williams M. *Sizing for self-expanding transcatheter aortic valve implantation*. EuroIntervention 2018; 14(5):e490-e493. DOI: [10.4244/EIJV14I5A86](https://doi.org/10.4244/EIJV14I5A86)

<sup>4</sup> Breitbart P, Minners J, Hein M, Schröfel H, Neumann FJ, Ruile P. *Implantation depth and its influence on complications after TAVI with self-expanding valves*. Int J Cardiovasc Imaging 2021; 37(10):3081-3092. DOI: [10.1007/s10554-021-02275-3](https://doi.org/10.1007/s10554-021-02275-3)

<sup>5</sup> Petronio AS, Sinning JM, Van Mieghem N, Zucchelli G, Nickenig G, Bekerredjian R, Bosmans J, Bedogni F, Branny M, Stangl K, Kovac J, Schiltgen M, Kraus S, de Jaegere P. *Optimal Implantation Depth and Adherence to Guidelines on Permanent Pacing to Improve the Results of Transcatheter Aortic Valve Replacement With the Medtronic CoreValve System: The CoreValve Prospective, International, Post-Market ADVANCE-II Study*. JACC Cardiovasc Interv 2015; 8(6):837-846. DOI: [10.1016/j.jcin.2015.02.005](https://doi.org/10.1016/j.jcin.2015.02.005)

Nonetheless, according to our data, the measure of intended mean implantation depth was overall a bit deeper than 4 mm, with Acurate and Portico/Evolut reporting median values of 5.7 mm (IQR: 4.9 ÷ 6.3 mm) and 6.0 mm (IQR: 5.0 ÷ 7.0 mm). Taking the nominal length of each device into account, this implies that the effective aortic landing zone was about 2 mm proximally repositioned. Specifically, at the level of ascending aorta, it was on average 2 mm shorter than the one calculated and analyzed on CT angiography and on average 2 mm longer at the level of LVOT.

For the sake of clarity and to assess the impact of this discrepancy, both angulations and curvature variables obtainable from the analysis of the landing zone centerline were extracted also considering a theoretical mean implantation depth of 6 mm. The distributions of the recalculated variables are reported below:

| Variables                                                                                                             | Overall<br>(n = 207) | Acurate<br>(n = 106) | Portico + Evolut<br>(n = 101) | P value           |
|-----------------------------------------------------------------------------------------------------------------------|----------------------|----------------------|-------------------------------|-------------------|
| $k_{LZ,tot} (10^{-1} \cdot mm^{-1})$                                                                                  | 1.30 (1.08, 1.51)    | 1.33 (1.19, 1.54)    | 1.24 (0.98, 1.47)             | <b>0.006</b>      |
| $\alpha_{LZ,Proximal} (^{\circ})$                                                                                     | 3.5 (1.9, 5.0)       | 2.8 (1.8, 4.5)       | 3.8 (2.0, 6.5)                | <b>0.009</b>      |
| $\alpha_{LZ,Distal} (^{\circ})$                                                                                       | 31.9 (24.1, 39.7)    | 37.7 (29.5, 42.5)    | 25.8 (20.3, 34.4)             | <b>&lt; 0.001</b> |
| Values expressed as median (IQR). <sup>§</sup> Acurate vs. Portico+Evolut. Significant values (P < 0.05) are in bold. |                      |                      |                               |                   |

Also, the median variation between the two different configurations ( $H_{mean,Pre} = 4\text{ mm}$  vs.  $H_{mean,Pre} = 6\text{ mm}$ ) is reported below for the recalculated variables:

| Variables                            | $H_{mean,Pre} = 4\text{ mm}$<br>(n = 207) | $H_{mean,Pre} = 6\text{ mm}$<br>(n = 207) | Median variation |
|--------------------------------------|-------------------------------------------|-------------------------------------------|------------------|
| $k_{LZ,tot} (10^{-1} \cdot mm^{-1})$ | 1.31 (1.09, 1.52)                         | 1.30 (1.08, 1.51)                         | - 0.01           |
| $\alpha_{LZ,Proximal} (^{\circ})$    | 2.1 (1.1, 3.1)                            | 3.5 (1.9, 5.0)                            | + 1.4            |
| $\alpha_{LZ,Distal} (^{\circ})$      | 34.0 (25.9, 42.9)                         | 31.9 (24.1, 39.7)                         | - 2.1            |
| Values expressed as median (IQR).    |                                           |                                           |                  |

Hence, assuming a mean implantation depth of 6 mm, we noticed a slight decrease in curvature ( $k_{LZ,tot}$ ), while the distal reduction in  $\alpha_{LZ,Distal}$  was accompanied by an increase in  $\alpha_{LZ,Proximal}$ . Nonetheless, despite these minor variations in the magnitude of each variable, the overall trends and statistical significance remained consistent between the two groups.

Portico and Evolut subgroups

In the design phase of the study, we chose to group the Portico and Evolut platforms based on several shared characteristics. Notably, both are self-expandable platforms featuring a similar cell-based stent frame and a same

bottom-up deployment mechanism. Nonetheless, there are differences between the two platforms warranting attention. The main difference lies in the flexibility of their delivery system: the Portico FlexNav<sup>TM</sup> system is made of a single spine technology, enabling multi-directional flexion, whereas the Evolut R/Pro+ Enveo system consists of a dual-spine configuration, restricting flexion to two directions. Furthermore, Portico stent is slightly longer than the Evolut-R/Pro+ (50-53 mm *vs.* 45-46 mm). While these differences could theoretically influence implantation depth, particularly in patients with a severely angulated aorta, current scientific literature does not offer evidence on this matter.

Therefore, we performed a sub-analysis of baseline and procedural characteristics stratifying the study population also by Portico (n = 26) and Evolut (n = 75) platforms. The results of this additional analysis are now included as Supplementary Table S1 and S2.

Specifically, baseline anatomical characteristics (Table S1) indicated that the Portico platform was preferred over Evolut for patient with smaller aortic dimension. Notably, no significant differences specifically arose between the Portico and Evolut platforms in terms of baseline curvature ( $k_{LZ,tot}$ ) and angulations ( $\alpha_{LZ,Proximal}$  and  $\alpha_{LZ,Distal}$ ). In terms of procedural variables, the Evolut platform reported a deeper intended implantation depth ( $H_{pre}$ ) at the LCC level with respect to the Portico platform, i.e., 7.0 (5.0, 8.0) *vs.* 5.0 (4.0, 7.0) mm,  $P = 0.003$  at post hoc analysis.

## Supplementary Figures

**Figure S1.** Bland-Altman plots of the differences between  $\Delta H_{LCC}$  and  $\Delta H_{NCC}$  evaluated within the Accurate and the Portico/Evolut groups clustering  $\Delta H$  data according to the median value of  $\kappa_{LZ,tot}$  and  $\alpha_{LZ,Dist}$ , respectively.

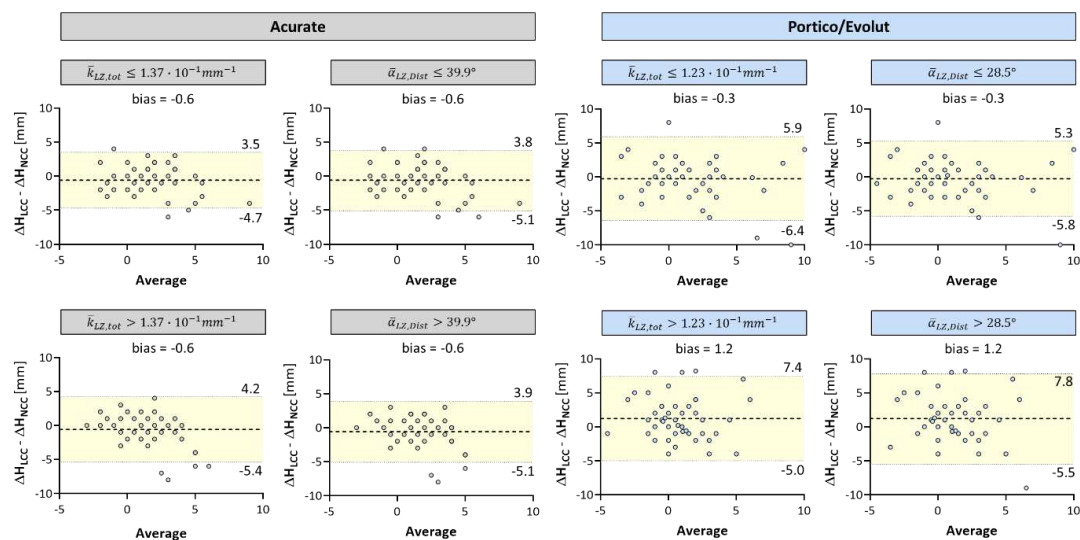

## Supplementary Tables

**Table S1.** Baseline patient characteristics for Accurate, Portico and Evolut patient subgroups.

| Variables                                                                                                                                                                                                                                                                                                                                                                                                                                                                                                                                                                                                                                                                                                                                                                                                                                                                                                                                                                                                                                                                                                                  | Accurate<br>(n = 106) | Portico<br>(n = 26)            | Evolut<br>(n = 75)             | P value           |
|----------------------------------------------------------------------------------------------------------------------------------------------------------------------------------------------------------------------------------------------------------------------------------------------------------------------------------------------------------------------------------------------------------------------------------------------------------------------------------------------------------------------------------------------------------------------------------------------------------------------------------------------------------------------------------------------------------------------------------------------------------------------------------------------------------------------------------------------------------------------------------------------------------------------------------------------------------------------------------------------------------------------------------------------------------------------------------------------------------------------------|-----------------------|--------------------------------|--------------------------------|-------------------|
| Age (years)                                                                                                                                                                                                                                                                                                                                                                                                                                                                                                                                                                                                                                                                                                                                                                                                                                                                                                                                                                                                                                                                                                                | 84 (80, 87)           | 80 (74, 86) <sup>§</sup>       | 82 (78, 85) <sup>§</sup>       | <b>0.007</b>      |
| Female sex                                                                                                                                                                                                                                                                                                                                                                                                                                                                                                                                                                                                                                                                                                                                                                                                                                                                                                                                                                                                                                                                                                                 | 69 (65.1)             | 15 (57.7)                      | 23 (30.7)                      | <b>&lt; 0.001</b> |
| BSA (m <sup>2</sup> )                                                                                                                                                                                                                                                                                                                                                                                                                                                                                                                                                                                                                                                                                                                                                                                                                                                                                                                                                                                                                                                                                                      | 1.80 ± 0.19           | 1.83 ± 0.2                     | 1.88 ± 0.20                    | <b>0.02</b>       |
| Hypertension                                                                                                                                                                                                                                                                                                                                                                                                                                                                                                                                                                                                                                                                                                                                                                                                                                                                                                                                                                                                                                                                                                               | 91 (85.9)             | 16 (61.5)                      | 57 (76.0)                      | <b>0.02</b>       |
| Diabetes                                                                                                                                                                                                                                                                                                                                                                                                                                                                                                                                                                                                                                                                                                                                                                                                                                                                                                                                                                                                                                                                                                                   | 27 (25.5)             | 3 (11.5)                       | 24 (32.0)                      | 0.12              |
| Dyslipidemia                                                                                                                                                                                                                                                                                                                                                                                                                                                                                                                                                                                                                                                                                                                                                                                                                                                                                                                                                                                                                                                                                                               | 51 (48.1)             | 7 (26.9)                       | 36 (48.0)                      | 0.13              |
| COPD                                                                                                                                                                                                                                                                                                                                                                                                                                                                                                                                                                                                                                                                                                                                                                                                                                                                                                                                                                                                                                                                                                                       | 8 (7.6)               | 3 (11.5)                       | 12 (16.0)                      | 0.20              |
| CAD                                                                                                                                                                                                                                                                                                                                                                                                                                                                                                                                                                                                                                                                                                                                                                                                                                                                                                                                                                                                                                                                                                                        | 16 (15.1)             | 7 (26.9)                       | 21 (28.0)                      | 0.08              |
| Prior AF                                                                                                                                                                                                                                                                                                                                                                                                                                                                                                                                                                                                                                                                                                                                                                                                                                                                                                                                                                                                                                                                                                                   | 37 (34.9)             | 5 (19.2)                       | 22 (29.3)                      | 0.28              |
| Prior CABG                                                                                                                                                                                                                                                                                                                                                                                                                                                                                                                                                                                                                                                                                                                                                                                                                                                                                                                                                                                                                                                                                                                 | 7 (6.6)               | 3 (11.5)                       | 12 (16.0)                      | 0.13              |
| Prior AMI                                                                                                                                                                                                                                                                                                                                                                                                                                                                                                                                                                                                                                                                                                                                                                                                                                                                                                                                                                                                                                                                                                                  | 10 (9.4)              | 2 (7.7)                        | 4 (5.3)                        | 0.60              |
| STS score (%)                                                                                                                                                                                                                                                                                                                                                                                                                                                                                                                                                                                                                                                                                                                                                                                                                                                                                                                                                                                                                                                                                                              | 2.5 (2.0, 3.2)        | 3.2 (1.7, 6.6)                 | 3.3 (2.1, 5.2)                 | 0.15              |
| Creatinine clearance (mL/min/1.73 m <sup>2</sup> )                                                                                                                                                                                                                                                                                                                                                                                                                                                                                                                                                                                                                                                                                                                                                                                                                                                                                                                                                                                                                                                                         | 65 (46, 79)           | 56 (42, 77)                    | 57 (43, 72)                    | 0.21              |
| Haemoglobin (g/dL)                                                                                                                                                                                                                                                                                                                                                                                                                                                                                                                                                                                                                                                                                                                                                                                                                                                                                                                                                                                                                                                                                                         | 12.9 ± 1.6            | 12.4 ± 1.9                     | 12.5 ± 1.7                     | 0.21              |
| Ejection fraction (%)                                                                                                                                                                                                                                                                                                                                                                                                                                                                                                                                                                                                                                                                                                                                                                                                                                                                                                                                                                                                                                                                                                      | 61.0 (55.0, 67.0)     | 62.0 (53.5, 69.5)              | 58.0 (50.0, 64.0) <sup>§</sup> | <b>0.02</b>       |
| Mean AV gradient (mmHg)                                                                                                                                                                                                                                                                                                                                                                                                                                                                                                                                                                                                                                                                                                                                                                                                                                                                                                                                                                                                                                                                                                    | 43.5 ± 12.2           | 46.7 ± 14.9                    | 45.4 ± 14.9                    | 0.46              |
| Aortic regurgitation ≥ moderate                                                                                                                                                                                                                                                                                                                                                                                                                                                                                                                                                                                                                                                                                                                                                                                                                                                                                                                                                                                                                                                                                            | 15 (14.2)             | 3 (11.5)                       | 14 (18.7)                      | 0.60              |
| LM height (mm)                                                                                                                                                                                                                                                                                                                                                                                                                                                                                                                                                                                                                                                                                                                                                                                                                                                                                                                                                                                                                                                                                                             | 13.1 ± 2.9            | 14.5 ± 2.7                     | 15.8 ± 4.0 <sup>§</sup>        | <b>&lt; 0.001</b> |
| RCA height (mm)                                                                                                                                                                                                                                                                                                                                                                                                                                                                                                                                                                                                                                                                                                                                                                                                                                                                                                                                                                                                                                                                                                            | 16.8 ± 3.0            | 18.7 ± 2.7 <sup>§</sup>        | 19.4 ± 4.2 <sup>§</sup>        | <b>&lt; 0.001</b> |
| Annulus minimal diameter (mm)                                                                                                                                                                                                                                                                                                                                                                                                                                                                                                                                                                                                                                                                                                                                                                                                                                                                                                                                                                                                                                                                                              | 20.7 ± 1.9            | 21.0 ± 2.3                     | 21.7 ± 3.1 <sup>§</sup>        | <b>0.03</b>       |
| Annulus maximal diameter (mm)                                                                                                                                                                                                                                                                                                                                                                                                                                                                                                                                                                                                                                                                                                                                                                                                                                                                                                                                                                                                                                                                                              | 25.8 ± 1.9            | 26.5 ± 2.1 <sup>‡</sup>        | 27.8 ± 2.7 <sup>§</sup>        | <b>&lt; 0.001</b> |
| Annulus mean diameter (mm)                                                                                                                                                                                                                                                                                                                                                                                                                                                                                                                                                                                                                                                                                                                                                                                                                                                                                                                                                                                                                                                                                                 | 23.3 ± 1.6            | 23.6 ± 1.9 <sup>‡</sup>        | 24.8 ± 2.5 <sup>§</sup>        | <b>&lt; 0.001</b> |
| Annulus perimeter (mm)                                                                                                                                                                                                                                                                                                                                                                                                                                                                                                                                                                                                                                                                                                                                                                                                                                                                                                                                                                                                                                                                                                     | 73.5 ± 5.0            | 74.3 ± 5.5 <sup>‡</sup>        | 78.2 ± 7.7 <sup>§</sup>        | <b>&lt; 0.001</b> |
| Annulus area (mm <sup>2</sup> )                                                                                                                                                                                                                                                                                                                                                                                                                                                                                                                                                                                                                                                                                                                                                                                                                                                                                                                                                                                                                                                                                            | 418.5 ± 59.5          | 425.5 ± 65.3 <sup>‡</sup>      | 474.3 ± 98.3 <sup>§</sup>      | <b>&lt; 0.001</b> |
| LVOT diameter (mm)                                                                                                                                                                                                                                                                                                                                                                                                                                                                                                                                                                                                                                                                                                                                                                                                                                                                                                                                                                                                                                                                                                         | 23.1 ± 1.9            | 22.8 ± 2.8 <sup>‡</sup>        | 24.3 ± 3.1 <sup>§</sup>        | <b>0.002</b>      |
| Valsalva diameter (mm)                                                                                                                                                                                                                                                                                                                                                                                                                                                                                                                                                                                                                                                                                                                                                                                                                                                                                                                                                                                                                                                                                                     | 31.5 ± 3.2            | 31.6 ± 2.8 <sup>‡</sup>        | 33.9 ± 3.8 <sup>§</sup>        | <b>&lt; 0.001</b> |
| Calcium volume 800 HU (mm <sup>3</sup> )                                                                                                                                                                                                                                                                                                                                                                                                                                                                                                                                                                                                                                                                                                                                                                                                                                                                                                                                                                                                                                                                                   | 223 (119, 384)        | 147 (69, 358)                  | 227 (125, 573)                 | 0.10              |
| Aortic angulation (°)                                                                                                                                                                                                                                                                                                                                                                                                                                                                                                                                                                                                                                                                                                                                                                                                                                                                                                                                                                                                                                                                                                      | 53.1 ± 10.8           | 45.6 ± 8.3 <sup>§</sup>        | 48.6 ± 9.5 <sup>§</sup>        | <b>&lt; 0.001</b> |
| Index of eccentricity                                                                                                                                                                                                                                                                                                                                                                                                                                                                                                                                                                                                                                                                                                                                                                                                                                                                                                                                                                                                                                                                                                      | 0.19 (0.16, 0.23)     | 0.21 (0.18, 0.25)              | 0.21 (0.17, 0.27)              | 0.18              |
| L <sub>AR</sub> (mm)                                                                                                                                                                                                                                                                                                                                                                                                                                                                                                                                                                                                                                                                                                                                                                                                                                                                                                                                                                                                                                                                                                       | 20.0 ± 3.3            | 21.0 ± 3.2                     | 21.9 ± 3.7 <sup>§</sup>        | <b>0.001</b>      |
| k <sub>AR,tot</sub> (10 <sup>-1</sup> ·mm <sup>-1</sup> )                                                                                                                                                                                                                                                                                                                                                                                                                                                                                                                                                                                                                                                                                                                                                                                                                                                                                                                                                                                                                                                                  | 0.30 (0.21, 0.40)     | 0.35 (0.26, 0.42)              | 0.35 (0.25, 0.48)              | 0.08              |
| k <sub>LZ,tot</sub> (10 <sup>-1</sup> ·mm <sup>-1</sup> )                                                                                                                                                                                                                                                                                                                                                                                                                                                                                                                                                                                                                                                                                                                                                                                                                                                                                                                                                                                                                                                                  | 1.37 (1.22, 1.59)     | 1.30 (1.02, 1.60)              | 1.19 (0.96, 1.47) <sup>§</sup> | <b>0.001</b>      |
| α <sub>STJ</sub> (°)                                                                                                                                                                                                                                                                                                                                                                                                                                                                                                                                                                                                                                                                                                                                                                                                                                                                                                                                                                                                                                                                                                       | 9.1 (5.4, 12.7)       | 8.2 (4.8, 12.3)                | 8.3 (5.2, 12.0)                | 0.64              |
| α <sub>LZ,Proximal</sub> (°)                                                                                                                                                                                                                                                                                                                                                                                                                                                                                                                                                                                                                                                                                                                                                                                                                                                                                                                                                                                                                                                                                               | 1.7 (1.1, 2.8)        | 2.4 (1.1, 4.0)                 | 2.5 (1.3, 3.9) <sup>§</sup>    | <b>0.02</b>       |
| α <sub>LZ,Distal</sub> (°)                                                                                                                                                                                                                                                                                                                                                                                                                                                                                                                                                                                                                                                                                                                                                                                                                                                                                                                                                                                                                                                                                                 | 40.0 (31.1, 45.7)     | 32.9 (21.1, 41.4) <sup>§</sup> | 27.8 (21.4, 34.0) <sup>§</sup> | <b>&lt; 0.001</b> |
| Values expressed as mean ± SD, median (IQR) or n (% of column total). AF, atrial fibrillation; AMI, acute myocardial infarction; BSA, body surface area; CABG, coronary artery bypass grafting; CAD, coronary artery disease; COPD, chronic obstructive pulmonary disease; HU, Hounsfield units; k <sub>AR,tot</sub> , total (cumulative) curvature of the aortic root centerline; k <sub>LZ,tot</sub> , total (cumulative) curvature of the landing zone centerline; L <sub>AR</sub> , aortic root length; LM, left main; LVOT, left ventricle outflow trunk; LZ, landing zone; RCA, right coronary artery; STJ, sinotubular junction; STS, Society of Thoracic Surgeons; α <sub>STJ</sub> , angulation of the STJ plane with respect to the aortic annulus plane; α <sub>LZ,Proximal</sub> , angulation of the proximal LZ plane with respect to the aortic annulus plane; α <sub>LZ,Distal</sub> , angulation of the distal LZ plane with respect to the aortic annulus plane. Post hoc analysis: <sup>§</sup> P < 0.05 vs. Accurate, <sup>‡</sup> P < 0.05 vs. Evolut; significant values (P < 0.05) reported in bold. |                       |                                |                                |                   |

**Table S2.** Procedural and in-hospital outcome for Accurate, Portico and Evolut patient subgroups.

| Variables                                                                                                                                                                                                                                                                                                                                                                                                                                                                                                                                                                                                                                                     | Acurate<br>(n = 106) | Portico<br>(n = 26)          | Evolut<br>(n = 75)             | P value <sup>§</sup> |
|---------------------------------------------------------------------------------------------------------------------------------------------------------------------------------------------------------------------------------------------------------------------------------------------------------------------------------------------------------------------------------------------------------------------------------------------------------------------------------------------------------------------------------------------------------------------------------------------------------------------------------------------------------------|----------------------|------------------------------|--------------------------------|----------------------|
| Femoral route                                                                                                                                                                                                                                                                                                                                                                                                                                                                                                                                                                                                                                                 | 106 (100)            | 20 (76.9)                    | 68 (90.7)                      | <b>&lt; 0.001</b>    |
| Subclavian route                                                                                                                                                                                                                                                                                                                                                                                                                                                                                                                                                                                                                                              | 0 (0.0)              | 4 (15.4)                     | 5 (6.7)                        | <b>0.001</b>         |
| EPS                                                                                                                                                                                                                                                                                                                                                                                                                                                                                                                                                                                                                                                           | 0 (0.0)              | 1 (3.8)                      | 1 (1.3)                        | 0.18                 |
| Any vascular complications                                                                                                                                                                                                                                                                                                                                                                                                                                                                                                                                                                                                                                    | 10 (9.4)             | 1 (3.8)                      | 3 (4.0)                        | 0.29                 |
| PTA with stenting of access site                                                                                                                                                                                                                                                                                                                                                                                                                                                                                                                                                                                                                              | 5 (4.7)              | 0 (0.0)                      | 3 (4.0)                        | 0.53                 |
| PCI with stenting                                                                                                                                                                                                                                                                                                                                                                                                                                                                                                                                                                                                                                             | 1 (0.9)              | 3 (11.5)                     | 4 (5.3)                        | <b>0.03</b>          |
| Predilatation                                                                                                                                                                                                                                                                                                                                                                                                                                                                                                                                                                                                                                                 | 104 (98.1)           | 16 (61.5)                    | 34 (45.3)                      | <b>&lt; 0.001</b>    |
| <b>Implantation depth</b>                                                                                                                                                                                                                                                                                                                                                                                                                                                                                                                                                                                                                                     |                      |                              |                                |                      |
| NCC H <sub>Pre</sub> (mm)                                                                                                                                                                                                                                                                                                                                                                                                                                                                                                                                                                                                                                     | 5.1 (4.3, 5.7)       | 6.0 (5.0, 8.0)               | 5.0 (4.0, 7.0)                 | 0.06                 |
| LCC H <sub>Pre</sub> (mm)                                                                                                                                                                                                                                                                                                                                                                                                                                                                                                                                                                                                                                     | 6.2 (5.3, 7.2)       | 5.0 (4.0, 7.0) <sup>†</sup>  | 7.0 (5.0, 8.0) <sup>§</sup>    | <b>0.002</b>         |
| NCC H <sub>Post</sub> (mm)                                                                                                                                                                                                                                                                                                                                                                                                                                                                                                                                                                                                                                    | 6.5 (4.8, 8.3)       | 6.5 (4.0, 8.3)               | 7.0 (5.0, 8.6)                 | 0.75                 |
| LCC H <sub>Post</sub> (mm)                                                                                                                                                                                                                                                                                                                                                                                                                                                                                                                                                                                                                                    | 7.2 (6.2, 8.8)       | 7.0 (6.0, 8.3)               | 8.0 (6.0, 10.0)                | 0.15                 |
| ΔH <sub>NCC</sub> (mm)                                                                                                                                                                                                                                                                                                                                                                                                                                                                                                                                                                                                                                        | 1.3 (0.1, 3.0)       | 0.0 (-1.0, 1.0) <sup>§</sup> | 0.0 (-1.0, 3.0)                | <b>0.01</b>          |
| ΔH <sub>LCC</sub> (mm)                                                                                                                                                                                                                                                                                                                                                                                                                                                                                                                                                                                                                                        | 1.0 (-0.1, 2.8)      | 1.5 (0.0, 3.0)               | 1.0 (0.0, 3.0)                 | 0.79                 |
| ΔH <sub>mean</sub> (mm)                                                                                                                                                                                                                                                                                                                                                                                                                                                                                                                                                                                                                                       | 1.6 (0.2, 2.8)       | 0.5 (0.0, 2.0)               | 0.7 (-0.5, 3.0)                | 0.22                 |
| Postdilatation                                                                                                                                                                                                                                                                                                                                                                                                                                                                                                                                                                                                                                                | 48 (45.3)            | 15 (57.7)                    | 37 (49.3)                      | 0.51                 |
| Emergent cardiac surgery                                                                                                                                                                                                                                                                                                                                                                                                                                                                                                                                                                                                                                      | 0 (0.0)              | 0 (0.0)                      | 0 (0.0)                        | -                    |
| Need for second valve                                                                                                                                                                                                                                                                                                                                                                                                                                                                                                                                                                                                                                         | 0 (0.0)              | 0 (0.0)                      | 0 (0.0)                        | -                    |
| Contrast volume (mL)                                                                                                                                                                                                                                                                                                                                                                                                                                                                                                                                                                                                                                          | 157 (130, 200)       | 135 (110, 179)               | 160 (130, 190)                 | 0.11                 |
| Radiation time (min)                                                                                                                                                                                                                                                                                                                                                                                                                                                                                                                                                                                                                                          | 21.4 (17.5, 26.9)    | 19.8 (14.5, 23.4)            | 23.0 (17.4, 29.5)              | 0.09                 |
| <b>In-hospital outcome</b>                                                                                                                                                                                                                                                                                                                                                                                                                                                                                                                                                                                                                                    |                      |                              |                                |                      |
| Ejection fraction (%)                                                                                                                                                                                                                                                                                                                                                                                                                                                                                                                                                                                                                                         | 62.0 (56.0, 67.0)    | 64.5 (54.5, 69.0)            | 58.0 (51.0, 63.0) <sup>§</sup> | <b>0.009</b>         |
| Mean gradient (mmHg)                                                                                                                                                                                                                                                                                                                                                                                                                                                                                                                                                                                                                                          | 9.0 (7.0, 12.0)      | 7.0 (6.0, 10.3)              | 7.0 (4.0, 10.0) <sup>§</sup>   | <b>0.002</b>         |
| PVL ≥ moderate                                                                                                                                                                                                                                                                                                                                                                                                                                                                                                                                                                                                                                                | 2 (1.9)              | 1 (3.8)                      | 6 (8.0)                        | 0.14                 |
| Device success                                                                                                                                                                                                                                                                                                                                                                                                                                                                                                                                                                                                                                                | 102 (96.2)           | 25 (96.2)                    | 69 (92.0)                      | 0.43                 |
| PPI                                                                                                                                                                                                                                                                                                                                                                                                                                                                                                                                                                                                                                                           | 4 (3.8)              | 2 (7.7)                      | 14 (18.7)                      | <b>0.004</b>         |
| Stroke                                                                                                                                                                                                                                                                                                                                                                                                                                                                                                                                                                                                                                                        | 2 (1.9)              | 1 (3.8)                      | 2 (2.7)                        | 0.83                 |
| In-hospital mortality                                                                                                                                                                                                                                                                                                                                                                                                                                                                                                                                                                                                                                         | 0 (0.0)              | 0 (0.0)                      | 0 (0.0)                        | -                    |
| Values expressed as mean ± SD, median (IQR) or n (% of column total). Mismatch in implantation depth (ΔH) calculated as H <sub>Post</sub> – H <sub>Pre</sub> . EPS, embolic protection system; H <sub>Post</sub> , final implantation depth; H <sub>Pre</sub> , pre-implantation intended depth; LCC, left coronary cusp; NCC, non-coronary cusp; PCI, percutaneous coronary intervention; PPI, permanent pacemaker implantation; PTA, percutaneous transluminal angioplasty; ΔH, variation of implantation depth.<br>Post hoc analysis: <sup>§</sup> P < 0.05 vs. Acurate, <sup>†</sup> P < 0.05 vs. Evolut; significant values (P < 0.05) reported in bold. |                      |                              |                                |                      |
